# Supplementary material for: Time-resolved in situ DRIFTS study on NH3-SCR of NO on a CeO2/TiO2 catalyst
Source: Royal Society of Chemistry journal article supplement (doi:10.1039/d1cy02089g), 2022-01-01
Supplement: d1cy02089g1.pdf [file d1cy02089g1.pdf]

## Time-resolved *in situ* DRIFTS study on NH<sub>3</sub>-SCR of NO on CeO<sub>2</sub>/TiO<sub>2</sub> catalyst

Jie Yang, Shan Ren\*, Mingming Wang, Zhichao Chen, Lin Chen, Lian Liu

College of Materials Science and Engineering, Chongqing University, Chongqing 400044, China

\* Corresponding author email: [shan.ren@cqu.edu.cn](mailto:shan.ren@cqu.edu.cn)(S. Ren)

### 1 Catalyst characterization

The surface morphology of CeO<sub>2</sub>/TiO<sub>2</sub> catalyst was observed using a FEI Tecnai G2 F20 transmission electron microscope equipped with a high-angle annular dark field (HAADF) detector in STEM mode. The local composition was determined by energy dispersive X-ray spectroscopy (EDS).

The X-ray diffraction (XRD) patterns of fresh CeO<sub>2</sub>/TiO<sub>2</sub> catalyst, used CeO<sub>2</sub>/TiO<sub>2</sub> catalyst for NH<sub>3</sub>+O<sub>2</sub> adsorption, used CeO<sub>2</sub>/TiO<sub>2</sub> catalyst for NO+O<sub>2</sub> adsorption, and used CeO<sub>2</sub>/TiO<sub>2</sub> catalyst for SCR were measured with a PANalytical X'Pert Powder diffractometer that using Cu K $\alpha$  radiation ( $\lambda = 0.15406$  nm) with the X-ray tube operated at 40 kV and 40 mA. Diffraction patterns were recorded between a  $2\theta$  range of 10-90° with scanning speed of 5°/min.

X-ray photoelectron spectroscopy (XPS) was performed to investigate the surface chemical states of Ce, Ti and O species in fresh CeO<sub>2</sub>/TiO<sub>2</sub> catalyst, used CeO<sub>2</sub>/TiO<sub>2</sub> catalyst for NH<sub>3</sub>+O<sub>2</sub> adsorption, used CeO<sub>2</sub>/TiO<sub>2</sub> catalyst for NO+O<sub>2</sub> adsorption, and used CeO<sub>2</sub>/TiO<sub>2</sub> catalyst for SCR with Thermo ESCALAB250Xi. The samples powders, which were transferred and pelletized with a diameter of 0.2 mm before and after testing under an inert atmosphere, were tested by XPS at room temperature. Additionally, the obtained binding energies were referenced to the C 1 s line at 284.6 eV.

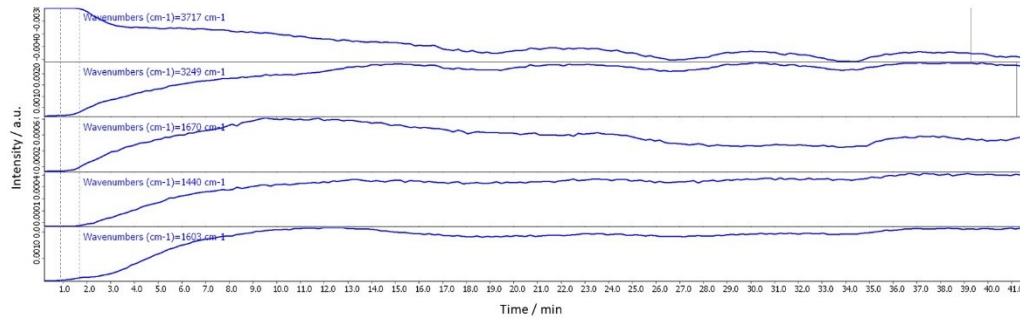

**Fig. S1** Temporal evolution of selected signals during  $\text{NH}_3$  adsorption on  $\text{CeO}_2/\text{TiO}_2$  catalyst at  $100^\circ\text{C}$ .

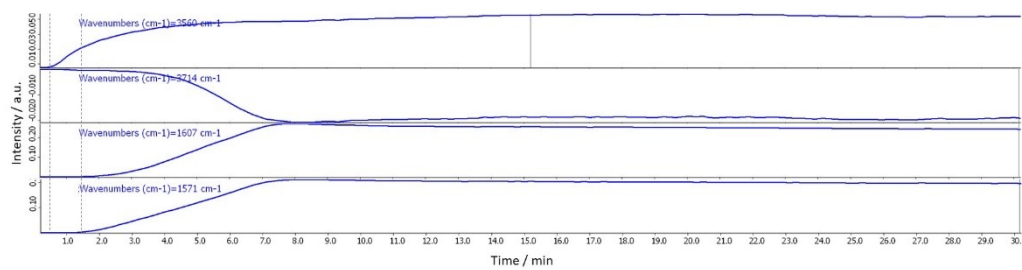

**Fig. S2** Temporal evolution of selected signals during NO adsorption on CeO<sub>2</sub>/TiO<sub>2</sub> catalyst at

100°C.
